# Supplementary material for: Check the Need–Prevalence and Outcome after Transvenous Cardiac Implantable Electric Device Extraction without Reimplantation
Source: MDPI journal article supplement (doi:10.3390/jcm10184043), 2021-09-07
Supplement: s1 [file s1]

## Supplemental material

**Supplemental Table S1.** Procedural outcome.

|                         | Total population<br>(n=223) | Reimplantation<br>(n=190) | Non-<br>reimplantation<br>(n=33) | p-<br>value |
|-------------------------|-----------------------------|---------------------------|----------------------------------|-------------|
| Extraction tools        |                             |                           |                                  | 0.223       |
| Manual traction         | 64.1% (n=143)               | 65.8% (n=125)             | 54.6% (n=18)                     |             |
| Mechanical sheath       | 34.1% (n=76)                | 32.1% (n=61)              | 45.5% (n=15)                     |             |
| Laser sheath            | 1.8% (n=4)                  | 2.1% (n=4)                | 0% (n=0)                         |             |
| Complete removal, n (%) | 95.5% (n=213)               | 94.7% (n=180)             | 100% (n=33)                      | 0.365       |
| Clinical success, n (%) | 99.6% (n=222)               | 100.0% (n=190)            | 97.0% (n=32)                     | 0.148       |
| Major complications     | 3.1% (n=7)                  | 2.6% (n=5)                | 6.1% (n=2)                       | 0.277       |
| Minor complications     | 3.1% (n=7)                  | 2.6% (n=5)                | 6.1% (n=2)                       | 0.277       |
| Blood transfusion       | 4.5% (n=10)                 | 3.2% (n=6)                | 12.1% (n=4)                      | 0.044*      |
| Days until discharge    | 8 (3-23)                    | 7 (3-21)                  | 14 (5-26)                        | 0.204       |

**Supplemental Table S2.** Individual patient characteristics of patients without reimplantation.

| No | Age,<br>gender | Device | Implantation<br>indication | Device/lead<br>age (months) | Indication for<br>explant | Reason for not-explant                                                | Follow up                                 |
|----|----------------|--------|----------------------------|-----------------------------|---------------------------|-----------------------------------------------------------------------|-------------------------------------------|
| 1  | 56, M          | ICD    | DCM                        | 16 / 117                    | endocarditis              | restoration of LV function                                            | alive after 3 months                      |
| 2  | 25, M          | ICD    | ARVD                       | 68 / 19                     | pocket infection          | negative<br>electrophysiological study<br>and MRI                     | alive after 13 months                     |
| 3  | 19, M          | ICD    | SCD                        | 11 / 11                     | pocket infection          | negative<br>electrophysiological study<br>and MRI                     | received ILR<br>alive after 110<br>months |
| 4  | 65, M          | CRT-D  | DCM                        | 93 / 93                     | pocket infection          | persistent infection                                                  | alive after 6 months                      |
| 5  | 57, M          | CRT-D  | ICM                        | 92 / 92                     | pocket infection          | restoration of LV function                                            | alive after 18 days                       |
| 6  | 75, M          | ICD    | DCM                        | 16 / 16                     | pocket infection          | negative<br>electrophysiological study,<br>restoration of LV function | alive after 45 months                     |

|    |       |       |     |           |                     |                                        |                                                                                                                  |
|----|-------|-------|-----|-----------|---------------------|----------------------------------------|------------------------------------------------------------------------------------------------------------------|
| 7  | 94, M | PM    | SSS | 78 / 78   | endocarditis        | no pauses at ECG<br>monitoring         | <b>death after 43<br/>months (senile<br/>decay)</b>                                                              |
| 8  | 80, M | PM    | SSS | 67 / 67   | pocket infection    | no pauses at ECG<br>monitoring         | alive after 118<br>months                                                                                        |
| 9  | 40, M | ICD   | DCM | 104 / 104 | non functional lead | negative<br>electrophysiological study | received ILR<br><b>reimplant after 17<br/>months (recurrence<br/>of arrhythmia)</b><br>alive after 117<br>months |
| 10 | 68, M | CRT-D | DCM | 78 / 78   | pocket infection    | persistent infection                   | alive after 85 months                                                                                            |
| 11 | 73, M | CRT-D | ICM | 43 / 43   | endocarditis        | persistent infection                   | alive after 16 months                                                                                            |
| 12 | 74, M | ICD   | DCM | 105 / 105 | endocarditis        | persistent infection                   | alive after 34 months                                                                                            |

|    |       |       |                  |           |                     |                                                         |                                                                             |
|----|-------|-------|------------------|-----------|---------------------|---------------------------------------------------------|-----------------------------------------------------------------------------|
| 13 | 74, M | CRT-D | DCM              | 82 / 82   | pocket infection    | patient preference                                      | <b>death after 39 months (Parkinson's disease)</b>                          |
| 14 | 65, F | PM    | SSS              | 86 / 86   | lead interference   | no pauses at ECG monitoring                             | alive after 5 days                                                          |
| 15 | 43, F | ICD   | Fallot Tetralogy | 170 / 170 | non functional lead | restoration of LV function, pulmonary valve replacement | <b>reimplant after 108 months (recurrent VTs)</b><br>alive after 108 months |
| 16 | 80, M | PM    | SSS              | 243 / 243 | pocket infection    | no pauses at ECG monitoring                             | <b>death after 33 months (advanced heart failure)</b>                       |
| 17 | 62, M | ICD   | ICM              | 52 / 52   | endocarditis        | patient preference                                      | <b>death after 34 months (cancer)</b>                                       |

|    |       |       |                  |          |                        |                                     |                                       |
|----|-------|-------|------------------|----------|------------------------|-------------------------------------|---------------------------------------|
| 18 | 44, M | ICD   | Brugada          | 78 / 78  | endocarditis           | persistent infection                | alive after 105 months                |
| 19 | 80, M | PM    | SSS              | 7 / 7    | pocket infection       | persistent infection                | alive after 101 months                |
| 20 | 54, F | CRT-D | DCM              | 93 / 93  | pocket infection       | restoration of LV function          | alive after 91 months                 |
| 21 | 63, M | ICD   | ICM              | 105 / 45 | pocket infection       | negative electrophysiological study | alive after 16 months                 |
| 22 | 82, M | PM    | syncope          | 7 / 7    | pain from implanted PM | patient preference                  | received ILR<br>alive after 14 months |
| 23 | 76, M | ICD   | ICM              | 22 / 22  | endocarditis           | persistent infection                | alive after 3 months                  |
| 24 | 33, M | ICD   | VT<br>idiopathic | 80 / 80  | non functional lead    | negative electrophysiological study | alive after 12 months                 |

|    |       |       |     |           |                     |                                                     |                                                                                                                    |
|----|-------|-------|-----|-----------|---------------------|-----------------------------------------------------|--------------------------------------------------------------------------------------------------------------------|
| 25 | 74, M | CRT-D | DCM | 138 / 150 | pocket infection    | restoration of LV function                          | received ILR<br><b>reimplant after 22 months</b><br><b>(deterioration of LV function)</b><br>alive after 23 months |
| 26 | 78, M | PM    | SSS | 58 / 58   | non functional lead | no pauses at ECG monitoring                         | alive after 80 months                                                                                              |
| 27 | 79, F | CRT-D | DCM | 0 / 0     | pocket infection    | persistent infection, patient preference            | alive after 3 months                                                                                               |
| 28 | 82, F | PM    | SSS | 81 / 81   | pocket infection    | persistent infection                                | alive after 2 months                                                                                               |
| 29 | 79, M | PM    | SSS | 24 / 216  | pocket infection    | no pauses at ECG monitoring                         | received ILR<br>alive after 74 months                                                                              |
| 30 | 76, M | CRT-D | DCM | 20 / 144  | endocarditis        | persistent infection,<br>restoration of LV function | alive after 68 months                                                                                              |
| 31 | 72, M | CRT-D | DCM | 2 / 72    | endocarditis        | negative<br>electrophysiological study              | alive after 6 months                                                                                               |

|    |       |       |     |          |              |                                |                                                                                        |
|----|-------|-------|-----|----------|--------------|--------------------------------|----------------------------------------------------------------------------------------|
| 32 | 73, M | PM    | SSS | 12 / 60  | endocarditis | no pauses at ECG<br>monitoring | alive after 69 months                                                                  |
| 33 | 68, M | CRT-D | DCM | 36 / 108 | endocarditis | persistent infection           | <b>reimplant after 56<br/>months (worsening<br/>symptoms)</b><br>alive after 66 months |
